# Supplementary material for: Discovery of Novel Hsp90 C-Terminal Inhibitors Using 3D-Pharmacophores Derived from Molecular Dynamics Simulations
Source: Int J Mol Sci. 2020 Sep 20;21(18):6898. doi: 10.3390/ijms21186898 (PMC7555175; doi:10.3390/ijms21186898)
Supplement: Supplementary file 1 [file ijms-21-06898-s001.pdf]

# Discovery of Novel Hsp90 C-Terminal Inhibitors Using 3D-Pharmacophores Derived from Molecular Dynamics Simulations

Tihomir Tomašič <sup>1,\*</sup>, Martina Durcik <sup>1</sup>, Bradley M. Keegan <sup>2</sup>, Darja Gramec Skledar <sup>1</sup>, Živa Zajec <sup>1</sup>, Brian S. J. Blagg <sup>2</sup> and Sharon D. Bryant <sup>3</sup>

<sup>1</sup> University of Ljubljana, Faculty of Pharmacy, Aškerčeva 7, 1000 Ljubljana, Slovenia; martina.durcik@ffa.uni-lj.si (M.D.); darja.gramec-skledar@ffa.uni-lj.si (D.G.S.); ziva.zajec@ffa.uni-lj.si (Ž.Z.)

<sup>2</sup> Department of Chemistry and Biochemistry, The University of Notre Dame, 305 McCourtney Hall, Notre Dame, IN 46556, USA; bkeegan@nd.edu (B.M.K.); bblagg@nd.edu (B.S.J.B.)

<sup>3</sup> Inte:Ligand Softwareentwicklungs- und Consulting GmbH, Mariahilferstrasse 74B, 1070 Vienna, Austria; bryant@inteligand.com

\* Correspondence: tihomir.tomasic@ffa.uni-lj.si; Tel.: +386-1-4769-556

**Table S1.** Structures and antiproliferative activities in SKBr3 cell line of Hsp90 CTD inhibitors **2** and **S1–S12** used as a training set for ligand-based (LB) pharmacophore model creation. Each ligand is shown aligned to the resulting LB model (exclusion volumes are not displayed).

| Cpd       | Structure                                                                                                                                                                         | SKBr3 IC <sub>50</sub> (μM) | Alignment with the 3D Ligand-Based Pharmacophore Model                               |
|-----------|-----------------------------------------------------------------------------------------------------------------------------------------------------------------------------------|-----------------------------|--------------------------------------------------------------------------------------|
| <b>2</b>  | 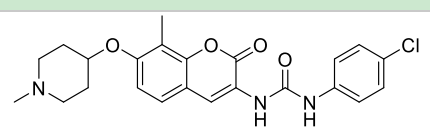<br><chem>CC1=C2C(C=C(NC(NC3=CC=C(Cl)C=C3)=O)C(O2)=O)=CC=C1OC4CCN(C)CC4</chem>                  | 0.17 [1]                    | 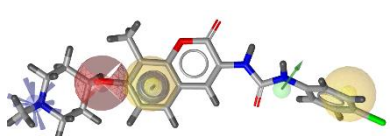 |
| <b>S1</b> | 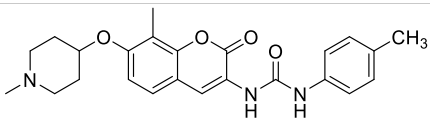<br><chem>CC1=C2C(C=C(NC(NC3=CC=C(C)C=C3)=O)C(O2)=O)=CC=C1OC4CCN(C)CC4</chem>                  | 0.27 [1]                    | 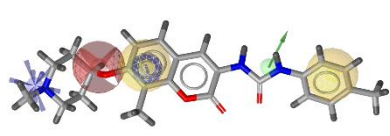 |
| <b>S2</b> | 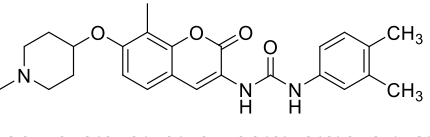<br><chem>CC1=C2C(C=C(NC(NC3=CC(C)=C(C)C=C3)=O)C(O2)=O)=CC=C1OC4CCN(C)CC4</chem>               | 0.31 [1]                    | 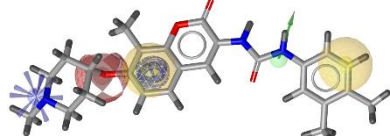 |
| <b>S3</b> | 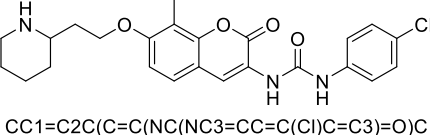<br><chem>CC1=C2C(C=C(NC(NC3=CC=C(Cl)C=C3)=O)C(O2)=O)=CC=C1OCC4NCCCC4</chem>                   | 0.21 [1]                    | 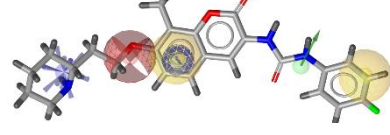 |
| <b>S4</b> | 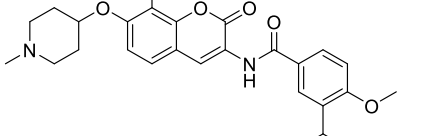<br><chem>CC1=C2C(C=C(NC(NC3=CC(C4=CC=CC(O)=C4)=C(OC)C=C3)=O)C(O2)=O)=CC=C1OC5CCN(C)CC5</chem> | 0.31 [1]                    | 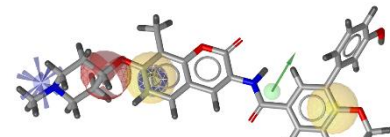 |

S5

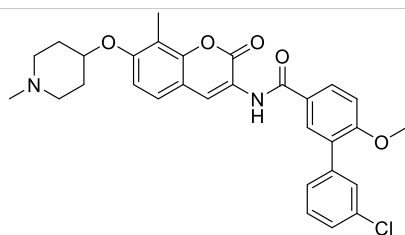

0.13 [1]

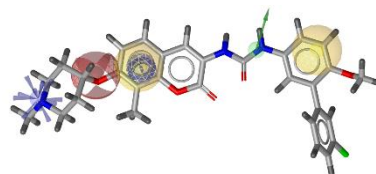
CC1=C2C(C=C(NC(C3=CC(C4=CC=CC(Cl)=C4)=C(OC)C=C3)=O)C(O2)=O)=CC=C1OC5CCN(C)CC5

S6

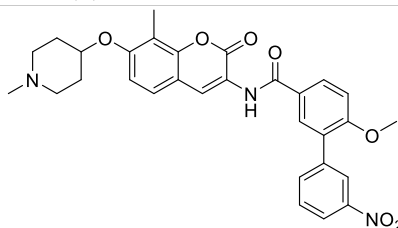

0.16 [1]

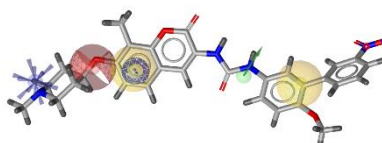
CC1=C2C(C=C(NC(C3=CC(C4=CC=CC([N+](=O)[O-])=O)=C4)=C(OC)C=C3)=O)C(O2)=O)=CC=C1OC5CCN(C)CC5

S7

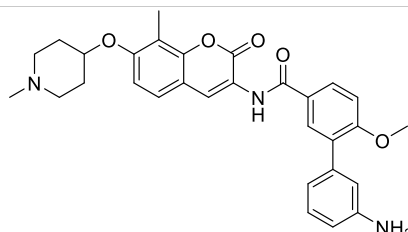

0.36 [1]

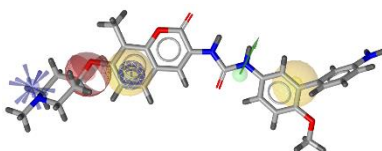
CC1=C2C(C=C(NC(C3=CC(C4=CC=CC(N)=C4)=C(OC)C=C3)=O)C(O2)=O)=CC=C1OC5CCN(C)CC5

S8

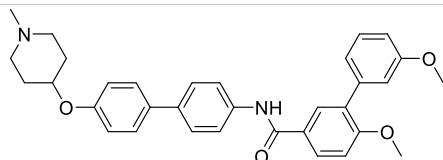

0.47 [2]

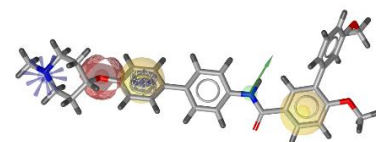
CN(CC1)CCC1OC(C=C2)=CC=C2C3=CC=C(NC(C4=CC(C5=CC=CC(OC)=C5)=C(OC)C=C4)=O)C=C3

S9

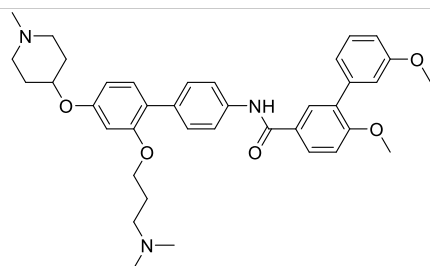

0.39 [2]

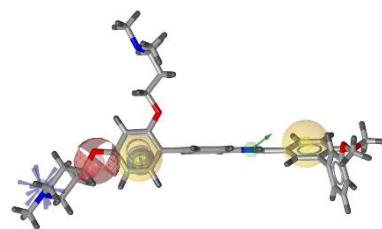
CN(CC1)CCC1OC(C=C2)=CC(OCCCN(C)C)=C2C3=CC=C(NC(C4=CC(C5=CC=CC(OC)=C5)=C(OC)C=C4)=O)C=C3

S10

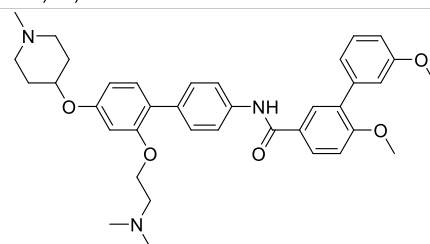

0.34 [2]

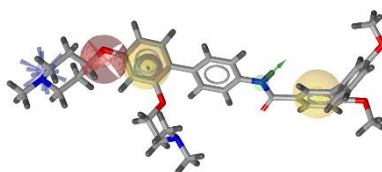
CN(CC1)CCC1OC(C=C2)=CC(OCCN(C)C)=C2C3=CC=C(NC(C4=CC(C5=CC=CC(OC)=C5)=C(OC)C=C4)=O)C=C3

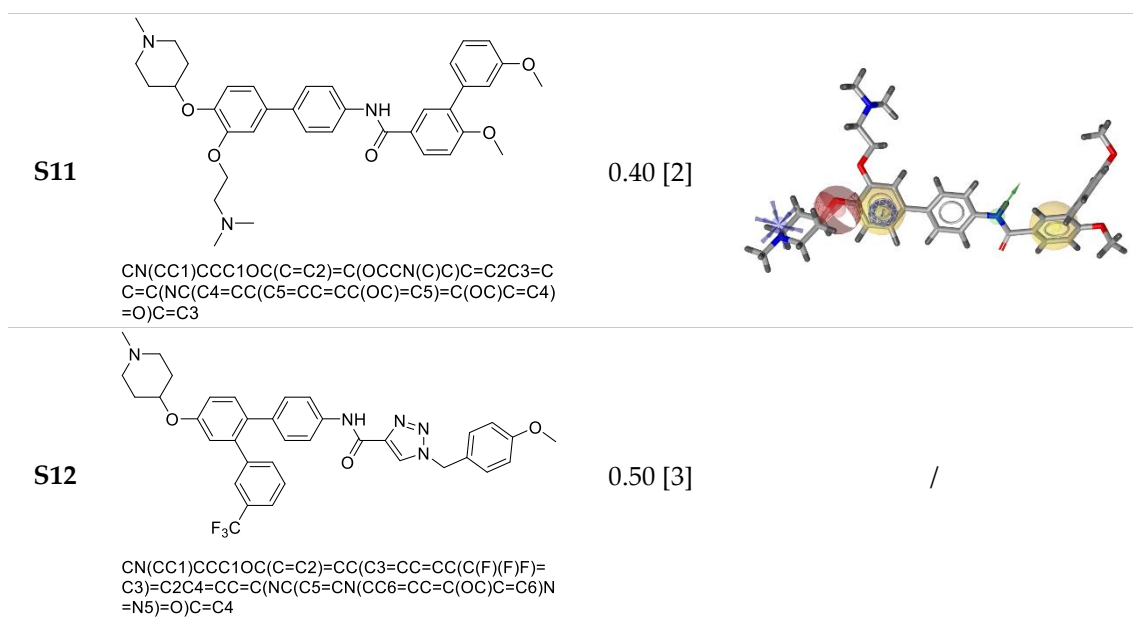

**Table S2.** Cell viability of Hep G2 and MCF-7 cells in MTS assay after treatment with compounds 5–12. Data are means  $\pm$  SD of three independent experiments performed in triplicates.

| Compound | Hep G2<br>% Viability | MCF-7<br>% Viability |
|----------|-----------------------|----------------------|
| 5        | 86.8 $\pm$ 7.6        | 93.5 $\pm$ 4.3       |
| 6        | 67.0 $\pm$ 3.7        | 71.0 $\pm$ 9.5       |
| 7        | 100.2 $\pm$ 6.0       | 99.5 $\pm$ 5.8       |
| 8        | 67.2 $\pm$ 3.0        | 65.2 $\pm$ 20.8      |
| 9        | 86.2 $\pm$ 12.8       | -0.53 $\pm$ 1.5      |
| 10       | 97.7 $\pm$ 7.5        | 116.5 $\pm$ 41.4     |
| 11       | 1.38 $\pm$ 0.1        | 31.4 $\pm$ 11.9      |
| 12       | 92.6 $\pm$ 4.3        | 93.8 $\pm$ 1.4       |

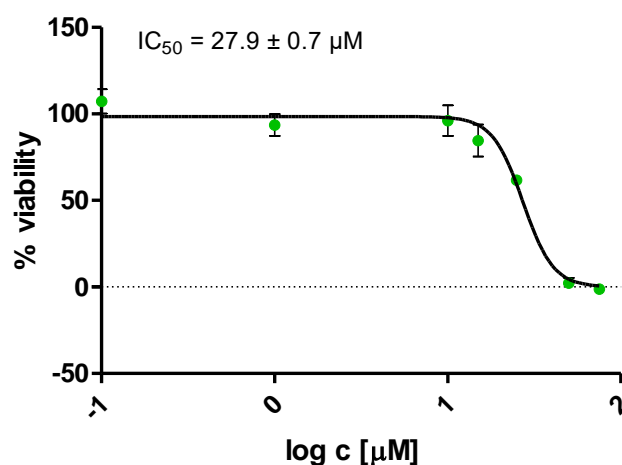

**Figure S1.** Dose-response curve for compound 11 in MTS assay in Hep G2 cell line, shown for an independent measurement in triplicate. The IC<sub>50</sub> value (mean  $\pm$  SD) is a result of three independent measurements.

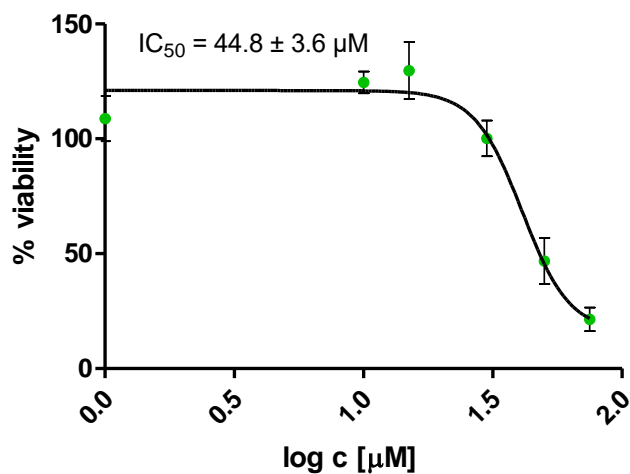

**Figure S2.** Dose-response curve for compound **11** in MTS assay in MCF-7 cell line, shown for an independent measurement in triplicate. The  $IC_{50}$  value (mean  $\pm$  SD) is a result of three independent measurements.

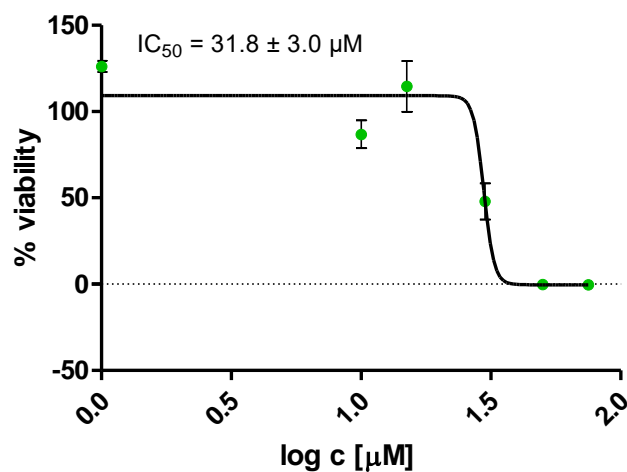

**Figure S3.** Dose-response curve for compound **9** in MTS assay in MCF-7 cell line, shown for an independent measurement in triplicate. The  $IC_{50}$  value (mean  $\pm$  SD) is a result of three independent measurements.

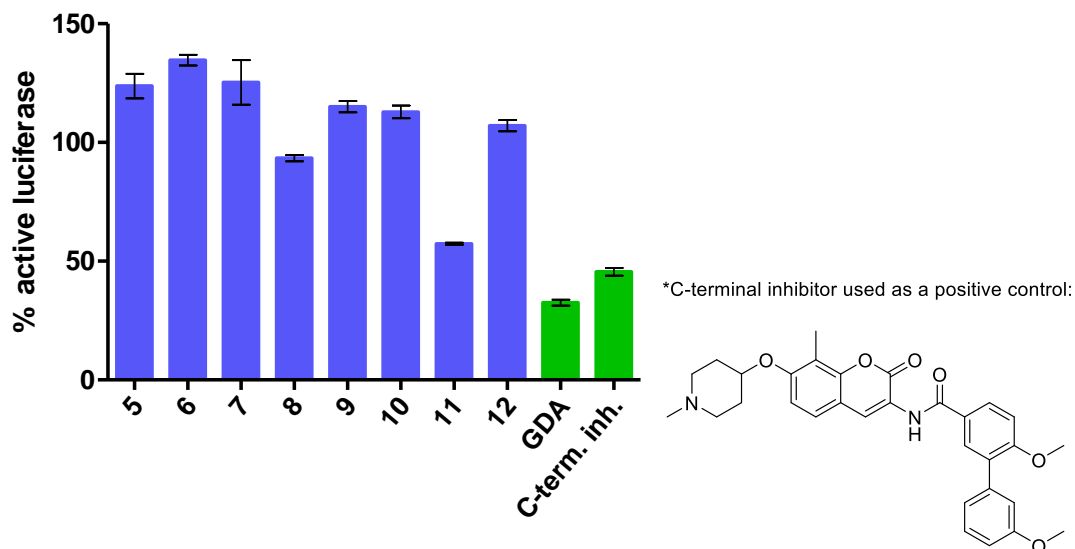

**Figure S4.** Luciferase refolding activity of Hsp90 in PC3 MM2 cells after treatment with compounds 5–12, C-terminal inhibitor\* and geldanamycin (GDA) at 50  $\mu$ M concentration. Data are means  $\pm$  SD of three independent experiments performed in triplicates.

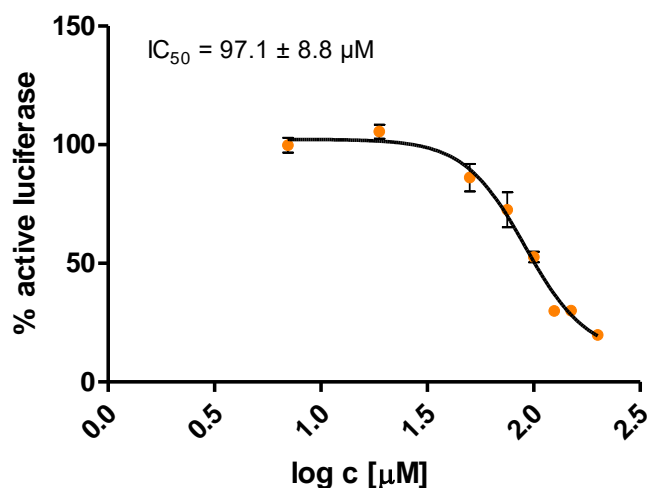

**Figure S5.** Dose-response curve for compound 11 in luciferase refolding assay on PC3 MM2 cell line, shown for an independent measurement in triplicate. The  $IC_{50}$  value (mean  $\pm$  SD) is a result of three independent measurements.

## References

1. Moroni, E.; Zhao, H.; Blagg, B.S.J.; Colombo, G. Exploiting Conformational Dynamics in Drug Discovery: Design of C-Terminal Inhibitors of Hsp90 with Improved Activities. *J. Chem. Inf. Mode.* **2014**, *54*, 195–208, doi:10.1021/ci4005767.
2. Garg, G.; Zhao, H.; Blagg, B.S.J. Design, Synthesis and Biological Evaluation of Alkylamino Biphenylamides as Hsp90 C-Terminal Inhibitors. *Bioorg. Med. Chem.* **2017**, *25*, 451–457, doi:10.1016/j.bmc.2016.11.030.
3. Davis, R.E.; Zhang, Z.; Blagg, B.S.J. A Scaffold Merging Approach to Hsp90 C-Terminal Inhibition: Synthesis and Evaluation of a Chimeric Library. *Med. Chem. Commun.* **2017**, *8*, 593–598, doi:10.1039/C6MD00377J.
